# Supplementary material
Source: publisher figshare collection journal article supplement (https://acs.figshare.com/ndownloader/files/3736498)
Supplement: Supplementary file 1 [file 3736498]

## Sheet: Sheet2
	Supplementary Table S3: List of 136 single amino acid variants (SAAV) and its wild-type peptides obtained from unidentified spectra using customized SAAV database from neXtProt which is consisted of dbSNP, COSMIC and Uniprot databases.

## Sheet: Sheet1
SAAV Peptide	Wild-type Peptide	Accesion Number	Gene Name	Variation Site	Variation Type	dbSNP	COSMIC	Altered Identification	XCorr score in CON_CID for SAAV	XCorr score in CON_ETD for SAAV	XCorr score in Alz_CID for SAAV	XCorr score in Alz_ETD for SAAV	XCorr score in EPT_CID for SAAV	XCorr score in EPT_ETD for SAAV	Best hit Xcorr score for wild-type peptide
MAETVDTSEMVNDATEQR	MAETVDTSEMVNGATEQR	NX_Q01082-1	SPTBN1	2153	G->D	n.d.	COSM277474	n.d.	n.d.	n.d.	n.d.	n.d.	n.d.	5.2744	182.992
ADPALLNDHSNLKPAPTVPSSPDATPEPK	ADPALLNNHSNLKPAPTVPSSPDATPEPK	NX_Q8N111-1	CEND1	74	N->D	rs11549485	n.d.	n.d.	n.d.	n.d.	n.d.	n.d.	n.d.	5.5281	1531.65
EEAAGPALALSLIEHYEPSETAK	EEAAGPALALSLIER	NX_P51178-1	PLCD1	257	R->H	rs933135	n.d.	NX_P51178-2	n.d.	n.d.	n.d.	n.d.	n.d.	4.9894	5707.37
SMIGEPTNFVHTAHVGSGDLFSGMTSVSSIQNQMQSK	SMIGEPTNFVHTAHVGSGDLFSGMNSVSSIQNQMQSK	NX_Q9NRR3-1	CDC42SE2	51	N->T	n.d.	COSM1200379	n.d.	n.d.	n.d.	n.d.	n.d.	n.d.	4.8468	211.668
EGSTHNWQHITDQIGMFCFTGLKPGQVER	EGSTHNWQHITDQIGMFCFTGLKPEQVER	NX_P00505-1	GOT2	389	E->G	n.d.	COSM471889	NX_P00505-2	n.d.	n.d.	n.d.	n.d.	n.d.	5.0683	5384.56
VVYSTLAGEQYHEVLVPK	VVYSTLAGEQYHEVLVPR	NX_Q92752-1	TNR	643	R->K	rs859427	COSM4143052	NX_Q92752-2	5.8146	7.2659	5.3474	n.d.	5.8746	6.141	362.524
QIAFPSGTPLHANSMVSENVIQSTAVTTVSSGTK	QIPFPSGTPLHANSMVSENVIQSTAVTTVSSGTK	NX_Q12904-1	AIMP1	79	P->A	rs1134648	n.d.	NX_Q12904-2	n.d.	n.d.	n.d.	n.d.	6.0897	4.3628	5264.09
KPAAGLSAAPVPTTPAAGAPLMDFGNDFVPPAPR	KPAAGLSAAPVPTAPAAGAPLMDFGNDFVPPAPR	NX_Q9NQC3-1	RTN4	71	A->T	rs117465650	n.d.	NX_Q9NQC3-2	n.d.	n.d.	n.d.	n.d.	5.1084	4.3976	5406.75
AMGIMNSVVNDIFER	AMGIMNSFVNDIFER	NX_P23527-1	HIST1H2BO	66	F->V	n.d.	COSM266666	n.d.	n.d.	n.d.	n.d.	n.d.	n.d.	4.1071	5155.73
APHLVGPHLGLETGNGGGIINLNAFDPTLPK	APHLVGPHLGLETGNGGGVINLNAFDPTLPK	NX_Q6P2I3-1	FAHD2B	52	V->I	rs201241480	n.d.	n.d.	n.d.	n.d.	n.d.	n.d.	n.d.	6.8168	5406.75
TQIAICPNNHEVHIYENSGAK	TQIAICPNNHEVHIYEK	NX_O15143-1	ARPC1B	37	K->N	rs1045012	COSM3982299	n.d.	n.d.	n.d.	n.d.	n.d.	5.191	6.1452	1.77373
NSNSYGIPEPAHAYAQPETTTPLPAVSGSPGAAITPLPSTQNGPVFAK	NSNSYGIPEPAHAYAQPQTTTPLPAVSGSPGAAITPLPSTQNGPVFAK	NX_P46109-1	CRKL	211	Q->E	n.d.	COSM725526	n.d.	n.d.	n.d.	n.d.	n.d.	n.d.	5.7155	5395.29
DAIKPNLMQTLEGTPVFVHAGPFANIAHGNSSIIADQIALK	DAIKPNLMQTLEGTPVFVHAGPFANIAHGNSSIIADR	NX_P11586-1	MTHFD1	653	R->Q	rs2236225	COSM3999330	n.d.	n.d.	n.d.	n.d.	n.d.	n.d.	6.3889	1184.99
LQQQHSEQPPLQPSPVTTR	LQQQHSEQPPLQPSPVMTR	NX_Q5JTV8-1	TOR1AIP1	146	M->T	rs1281378	COSM4143081	NX_Q5JTV8-2	n.d.	n.d.	n.d.	n.d.	n.d.	6.0406	2.42311
EANALAAGHPAQAAAINAR	EANALAAGHPAQAVAINAR	NX_O15020-1	SPTBN2	1034	V->A	rs506028	COSM3752673	NX_O15020-2	5.6428	n.d.	n.d.	n.d.	5.5627	7.05	5005.06
LYACEVTHQGLSSPVTK	VYACEVTHQGLSSPVTK	NX_P01834-1	IGKC	83	V->L	rs232230	n.d.	n.d.	n.d.	n.d.	n.d.	n.d.	n.d.	6.8166	5149.57
THEGWGVMLPCNPPAHYPGLSYR	AHEGWGVMLPCNPPAHYPGLSYR	NX_Q02246-1	CNTN2	145	A->T	rs2275697	COSM3746743	n.d.	n.d.	n.d.	n.d.	n.d.	n.d.	5.0609	795.698
VSDGSLLYNAGNICNHFFTR	ASDGSLLYNAGNICNHFFTR	NX_Q3KQV9-1	UAP1L1	319	A->V	rs7037849	COSM3763811	NX_Q3KQV9-2	4.8061	n.d.	n.d.	n.d.	4.7832	5.7863	12.2299
SNIYVCMISYAHNVAAQGK	SDIYVCMISYAHNVAAQGK	NX_P31150-1	GDI1	331	D->N	n.d.	COSM457115	n.d.	n.d.	n.d.	n.d.	n.d.	n.d.	5.2436	161.409
SGGTLVLVGLGSEMTTVPLLHAAIR	SGGNLVLVGLGSEMTTVPLLHAAIR	NX_Q00796-1	SORD	269	N->T	rs930337	COSM3773724	n.d.	5.6008	n.d.	5.2034	n.d.	5.3447	6.814	4976.25
GSESPRPNPPHAAPTGSQEPGR	GSESPRPNPPHAAPTGSQEPVR	NX_Q86TI0-1	TBC1D1	228	V->G	rs10501	COSM447822	NX_Q86TI0-2	n.d.	n.d.	n.d.	n.d.	n.d.	6.2479	2.01308
AAVSHWQQQSYQDSGIHSGATTTAPSLSGK	AAVSHWQQQSYLDSGIHSGATTTAPSLSGK	NX_P35222-1	CTNNB1	31	L->Q	n.d.	COSM30544	n.d.	n.d.	n.d.	n.d.	n.d.	n.d.	6.1958	5163.43
WQQGNVFSCSVMHEGLHNHYTQK	WQQGNVFSCSVMHEALHNHYTQK	NX_P01857-1	IGHG1	314	A->G	rs113804727	n.d.	n.d.	n.d.	n.d.	n.d.	n.d.	n.d.	7.4651	59.5204
EPSAPSIPTPAYQSLPAGGHAPTPPTPAPR	EPSAPSIPTPAYQSSPAGGHAPTPPTPAPR	NX_Q8WUM4-1	PDCD6IP	730	S->L	rs1127732	n.d.	NX_Q8WUM4-2	n.d.	n.d.	n.d.	n.d.	n.d.	5.254	1537.66
LLSMTLSPDLHTR	LLSMTLSPDLHMR	NX_Q9BTW9-1	TBCD	617	M->T	rs2292971	COSM3756052	NX_Q9BTW9-3;NX_Q9BTW9-5	n.d.	n.d.	n.d.	n.d.	n.d.	3.8544	6.4299
MTWLTPLIPSTLLSLGGLPPLTGFLPK	LTWLTPLIPSTLLSLGGLPPLTGFLPK	NX_P03891-1	MT	237	L->M	rs28357984	n.d.	n.d.	n.d.	n.d.	n.d.	n.d.	n.d.	4.9573	5848.64
FNLSQESSYIATQYSLRPR	FSLSQESSYIATQYSLRPR	NX_Q14739-1	LBR	154	S->N	rs2230419	n.d.	n.d.	n.d.	n.d.	n.d.	n.d.	n.d.	4.5698	0.95792
FNKPFVFLMIDQNTK	FNKPFVFLMIEQNTK	NX_P01009-1	SERPINA1	400	E->D	rs1303	COSM147838	n.d.	n.d.	n.d.	4.8882	n.d.	n.d.	5.6027	5438.78
LNSSSGSGSGSSVSSPSWAGR	LNSSSGSGSGSSGSSVSSPSWAGR	NX_P27987-1	ITPKB	92	SSGS->S	rs147889095	COSM904768	NX_P27987-2	n.d.	n.d.	n.d.	n.d.	5.2736	5.9473	1068.65
AGVAAPATQVVQVTLQSVQR	AGVAAPATQVAQVTLQSVQR	NX_Q15149-1	PLEC	641	A->V	rs11136336	COSM3763179	NX_Q15149-2;NX_Q15149-4;NX_Q15149-6;NX_Q15149-8	6.773	n.d.	7.4462	n.d.	5.1006	7.0762	5700.37
DGVADVSIEDSVISVSGDHCIIGR	DGVADVSIEDSVISLSGDHCIIGR	NX_P00441-1	SOD1	107	L->V	ALS1 (Uniprot)		n.d.	n.d.	n.d.	n.d.	n.d.	n.d.	5.7756	5773.26
QLLGHMEDLEGDAQSVLNAR	QLLGHMEDLEGDAQSVLDAR	NX_Q9NX46-1	ADPRHL2	231	D->N	n.d.	COSM362743	n.d.	n.d.	n.d.	n.d.	n.d.	n.d.	4.7	60.3683
AQVEIVTDGEEPAEMIQVLGPRPALK	AQVEIVTDGEEPAEMIQVLGPKPALK	NX_P40121-1	CAPG	227	K->R	rs117284777	n.d.	n.d.	n.d.	n.d.	n.d.	n.d.	4.5298	5.2916	1107.12
AAPSTAPAEATLPKPGEAEAPPK	AAPSTAPAEATPPKPGEAEAPPK	NX_O95817-1	BAG3	407	P->L	rs3858340	COSM3751563	n.d.	n.d.	n.d.	n.d.	n.d.	n.d.	6.1523	12.0319
HLEEPGETQNAFLHER	HLEEPGETQNAFLNER	NX_P05060-1	CHGB	200	N->H	rs881118	COSM3758669	n.d.	n.d.	n.d.	n.d.	n.d.	5.3305	5.5534	6065.21
LGEHNIDVLEGNEQFINAAK	LGEHNIEVLEGNEQFINAAK	NX_P07477-1	PRSS1	79	E->D	n.d.	COSM1448759	n.d.	5.5645	6.0936	4.9575	n.d.	6.4258	8.6428	3.81405
APSPLYSVEFSEEPFGVIVHR	APSPLYSVEFSEEPFGVIVR	NX_P10253-1	GAA	223	R->H	rs1042395	COSM3721877	n.d.	4.4354	7.5836	n.d.	5.2861	5.0601	6.4194	0.239595
SEVHTEAVQAALAK	SDVHTEAVQAALAK	NX_Q9Y2E4-1	DIP2C	90	D->E	rs201441750	n.d.	n.d.	n.d.	n.d.	n.d.	n.d.	n.d.	5.4601	183.15
FVFHQEQVYCPNCAK	FVFHQEQVYCPDCAK	NX_Q13642-1	FHL1	275	D->N	rs151315725	n.d.	NX_Q13642-4	n.d.	n.d.	n.d.	n.d.	n.d.	3.8248	5076.63
LGQSDPAPLQHQMDIYQK	CEAFGWHAIIVDGHSVEELCK	NX_P29401-1	TKT	205	R->P	rs184742148	n.d.	NX_P29401-2	n.d.	n.d.	n.d.	n.d.	n.d.	7.4189	49.8307
NEIPNSHILDQYR	NEIPNSHILDQYR	NX_P35520-1	CBS	211	K->R	rs201118737	n.d.	NX_P35520-2	n.d.	n.d.	n.d.	n.d.	n.d.	3.9861	29.5932
AVAVLTSGGDAQGMNAAVR	AIAVLTSGGDAQGMNAAVR	NX_P08237-1	PFKM	18	I->V	rs150405056	n.d.	NX_P08237-2	n.d.	n.d.	n.d.	n.d.	n.d.	6.674	5606.03
QPPGTQQSHSSPGQITSSPQGLDNPALLR	QPPGTQQSHSSPGEITSSPQGLDNPALLR	NX_Q5TDH0-1	DDI2	124	E->Q	n.d.	COSM675951	NX_Q5TDH0-2	n.d.	n.d.	n.d.	n.d.	n.d.	4.9616	5384.56
NINNPALADIYTEHAHQVVVAK	NIDNPALADIYTEHAHQVVVAK	NX_O75083-1	WDR1	46	D->N	n.d.	COSM86162	n.d.	n.d.	n.d.	n.d.	n.d.	n.d.	6.4584	5330.52
YFLNHINQTTTWQDPR	YFLNHIDQTTTWQDPR	NX_P46937-1	YAP1	194	D->N	n.d.	COSM1233006	NX_P46937-2;NX_P46937-4;NX_P46937-6;NX_P46937-8	n.d.	n.d.	n.d.	n.d.	n.d.	5.263	2498.82
SAVDQAGGAQIVINHLR	SAVDQAGGAQIVIDHLR	NX_P52306-1	RAP1GDS1	138	D->N	n.d.	COSM588811	NX_P52306-4	n.d.	n.d.	n.d.	n.d.	n.d.	4.8775	5314.98
ALGISPFHQHAEVVFTANDSGPR	ALGISPFHEHAEVVFTANDSGPR	NX_P02766-1	TTR	109	E->Q	AMYL-TTR (Uniprot)		n.d.	n.d.	n.d.	n.d.	n.d.	n.d.	5.4537	4004.33
QQVHVQLDVAKPDLTAALK	QQVHVELDVAKPDLTAALK	NX_P14136-1	GFAP	223	E->Q	rs56679084	n.d.	NX_P14136-2	n.d.	n.d.	n.d.	n.d.	n.d.	7.1384	5588.58
LLAGDHPIDLLLR	LLAGDHPIDLLLR	NX_Q14515-1	SPARCL1	566	R->K	n.d.	COSM233475	n.d.	n.d.	n.d.	n.d.	n.d.	n.d.	4.2369	5301.6
FLHVPNTFEGHFDGVPVISK	FLHVPDTFEGHFDGVPVISK	NX_P19823-1	ITIH2	228	D->N	n.d.	COSM1492373	n.d.	n.d.	n.d.	n.d.	n.d.	n.d.	6.3482	2700.72
TTGIVLNSGDGVTHNVPIYEGYALPHAIMR	TTGIVLDSGDGVTHNVPIYEGYALPHAIMR	NX_P68133-1	ACTA1	156	D->N	NEM3 (Uniprot)		n.d.	n.d.	n.d.	n.d.	n.d.	n.d.	7.6444	5384.56
VADAPTNAVAHVDDMPNALSALSDLHAHK	VADALTNAVAHVDDMPNALSALSDLHAHK	NX_P69905-1	HBA1	67	L->P	rs41323248	n.d.	n.d.	n.d.	6.9592	n.d.	n.d.	n.d.	7.0025	5606.03
CTASNFLGTATHNFHVIVEEPPR	CTASNFLGTATHDFHVIVEEPPR	NX_O00533-1	CHL1	322	D->N	n.d.	COSM1718408	NX_O00533-2	n.d.	n.d.	n.d.	n.d.	n.d.	5.8741	5301.6
LKPYFLTDGTGTVTPANASGINDGAAAVVLMK	LKPYFLTDGTGTVTPANASGINDGAAAVVLMK	NX_Q9BWD1-1	ACAT2	264	MK->M	n.d.	COSM1441929	n.d.	n.d.	n.d.	n.d.	n.d.	n.d.	5.8701	5606.03
FFNSFGNLSSASAIMGNPK	FFDSFGNLSSASAIMGNPK	NX_P69891-1	HBG1	44	D->N	rs41475844	n.d.	n.d.	n.d.	n.d.	n.d.	n.d.	n.d.	5.8945	5394.93
GPLVFGEPIAASLGTNGTHYWSK	GPLVFGEPIAASLGTDGTHYWSK	NX_Q14194-1	CRMP1	286	D->N	n.d.	COSM1430381	NX_Q14194-2	n.d.	n.d.	n.d.	n.d.	n.d.	6.4688	5606.03
MVHNGIQYGDMQLICEAYHLMK	MVHNGIEYGDMQLICEAYHLMK	NX_P52209-1	PGD	191	E->Q	n.d.	COSM1294643	NX_P52209-2	n.d.	n.d.	n.d.	n.d.	n.d.	6.6886	5076.63
IDSVLLTHIGANNLPGINGLLQR	IDSVLLTHIGADNLPGINGLLQR	NX_P78559-1	MAP1A	93	D->N	n.d.	COSM433909	NX_P78559-2	n.d.	n.d.	n.d.	n.d.	n.d.	5.352	5394.93
LGLDFPNLPYLIDGTHK	LGLDFPNLPYLIDGAHK	NX_P46439-1	GSTM5	67	A->T	rs17854972	n.d.	n.d.	n.d.	n.d.	n.d.	n.d.	n.d.	6.3243	5606.03
THTSQAILQPVLAAENFTIFK	THTSQAILQPVLAAEDFTIFK	NX_Q96G28-1	CCDC104	105	D->N	n.d.	COSM1021880	NX_Q96G28-2	n.d.	n.d.	n.d.	n.d.	n.d.	4.7738	5.51572
MELLHPLGLDSPIAGFLQK	MELLHPLGR	NX_Q96PE7-1	MCEE	104	R->L	rs6748672	COSM4001734	n.d.	n.d.	n.d.	5.3287	n.d.	6.0213	7.7569	0.342393
GIHSAINASQTPDVVFASILAAFSK	GIHSAIDASQTPDVVFASILAAFSK	NX_P54819-1	AK2	211	D->N	rs143825456	n.d.	NX_P54819-2;NX_P54819-6	n.d.	n.d.	n.d.	n.d.	n.d.	5.9013	5404.6
MQYAPNTQVEILPQGR	MQYAPNTQVEILPQGHESPIFK	NX_P40121-1	CAPG	335	H->R	rs6886	n.d.	NX_P40121-2	n.d.	n.d.	3.7307	n.d.	4.7014	4.8666	5252.76
RPCFSALELDETYVPK	RPCFSALEVDETYVPK	NX_P02768-1	ALB	517	V->L	n.d.	COSM588146	NX_P02768-2	n.d.	n.d.	n.d.	n.d.	n.d.	5.4159	5078.32
IVSWCQVGVEPSIMGIGPIPAIK	IVSWSQVGVEPSIMGIGPIPAIK	NX_Q9BWD1-1	ACAT2	284	S->C	rs146437481	n.d.	n.d.	n.d.	n.d.	n.d.	n.d.	4.3817	3.9865	5467.72
HADAKPFEVPFLK	HANAKPFEVPFLK	NX_Q9UKK9-1	NUDT5	208	N->D	n.d.	COSM1603043	n.d.	n.d.	n.d.	n.d.	n.d.	n.d.	4.2342	5320.63
TYFPYFDLSHGSAQVK	TYFPHFDLSHGSAQVK	NX_P69905-1	HBA1	46	H->Y	rs33931984	n.d.	n.d.	n.d.	n.d.	n.d.	n.d.	n.d.	5.2876	5291.58
VADALTNAVAHVDDMHNALSALSDLHAHK	VADALTNAVAHVDDMPNALSALSDLHAHK	NX_P69905-1	HBA1	78	P->H	rs34019158	n.d.	n.d.	n.d.	n.d.	n.d.	n.d.	n.d.	4.5114	5606.03
AMVALIDIFHQYSGR	AMVALIDVFHQYSGR	NX_P04271-1	S100B	14	V->I	n.d.	COSM189736	n.d.	n.d.	n.d.	n.d.	n.d.	n.d.	5.4713	5615.53
SLLSNVEGDNAVHMQHNNRPTQPLK	SLLSNVEGDNAVPMQHNNRPTQPLK	NX_P00915-1	CA1	241	P->H	n.d.	COSM360450	n.d.	n.d.	n.d.	n.d.	n.d.	n.d.	3.8092	5089.45
LLGNVLVCVLAHHYGK	LLGNVLVCVLAHHFGK	NX_P68871-1	HBB	119	F->Y	rs33928092	n.d.	n.d.	n.d.	n.d.	n.d.	n.d.	n.d.	4.4831	5700.37
ALTPQCGSGEDLYILTGTVPSDYGVK	ALTPQCGSGEDLYILTGTVPSDYR	NX_O94919-1	ENDOD1	208	R->G	rs75384502	n.d.	n.d.	n.d.	n.d.	n.d.	n.d.	5.7652	n.d.	25.4562
AFSEYLGTDQSK	AFSGYLGTDQSK	NX_P10768-1	ESD	190	G->E	rs9778	n.d.	n.d.	n.d.	n.d.	3.4734	n.d.	3.5625	n.d.	59.1474
LQGASWDTQSGPQER	LQGASWDTQNGPQER	NX_Q15049-1	MLC1	344	N->S	rs11568188	COSM1416980	NX_Q15049-2	n.d.	n.d.	n.d.	n.d.	4.7081	n.d.	31.7748
TQYEVMASSNMHEAEEWYR	TQYEAMASSNMHEAEEWYR	NX_P14136-1	GFAP	244	A->V	rs61497286	n.d.	NX_P14136-2	n.d.	n.d.	n.d.	n.d.	4.9226	n.d.	5900.48
TQYEAMASSNMHEAEEWYPSK	TQYEAMASSNMHEAEEWYR	NX_P14136-1	GFAP	258	R->P	rs61726468	n.d.	NX_P14136-2	4.0126	6.2733	n.d.	5.719	4.1653	n.d.	5900.48
SGAHSFISGLPQGYDTEVGEAGSQLSGGQR	SGAHSFISGLPQGYDTEVDEAGSQLSGGQR	NX_Q03518-1	TAP1	697	D->G	rs1135216	COSM4161045	n.d.	n.d.	n.d.	n.d.	n.d.	6.5143	n.d.	198.027
FSANLSWLFPELPGLPAR	FSANLSWLFPELSGLPAR	NX_Q5T013-1	HYI	18	S->P	rs6692611	COSM4143989	NX_Q5T013-3	n.d.	n.d.	n.d.	n.d.	4.9552	n.d.	5606.03
FSSACDMGGCTGALAR	FSSACDVGGCTGALAR	NX_O95671-1	ASMTL	458	V->M	rs4503285	COSM3363918	NX_O95671-2	n.d.	n.d.	n.d.	n.d.	4.3407	n.d.	4.53233
CITIIGGGDTATCCAK	GCITIIGGGDTATCCAK	NX_P00558-1	PGK1	366	G->R	rs150956842	n.d.	n.d.	n.d.	n.d.	n.d.	n.d.	4.6105	n.d.	5467.72
GPILLELQTYR	GPILMELQTYR	NX_P08559-1	PDHA1	282	M->L	rs2229137	COSM1740793	NX_P08559-2;NX_P08559-4	n.d.	n.d.	n.d.	n.d.	3.3698	n.d.	387.613
LTTPTYGDLNHPVSATMSGVTTCLR	LTTPTYGDLNHLVSATMSGVTTCLR	NX_Q9BVA1-1	TUBB2B	228	L->P	PMGYSA (Uniprot)		n.d.	5.068	n.d.	n.d.	n.d.	4.6302	n.d.	10251.6
NTVLATWQPYSTSK	NTVLATWQPYTTSK	NX_Q9BY44-1	EIF2A	97	T->S	rs1132979	COSM4002486	n.d.	n.d.	n.d.	n.d.	n.d.	4.0772	n.d.	5301.25
SVLVTSSSSLPSFPSTLSWSR	SALVTSSSSLPSFPSTLSWSR	NX_Q14161-1	GIT2	552	A->V	rs11068997	n.d.	NX_Q14161-3;NX_Q14161-6	n.d.	n.d.	n.d.	n.d.	4.6918	n.d.	5700.37
GGTLSTPQTGSENDALYEYLR	GGTLGTPQTGSENDALYEYLR	NX_P05452-1	CLEC3B	106	G->S	rs13963	COSM3760111	n.d.	n.d.	n.d.	n.d.	n.d.	5.0267	n.d.	31.4043
TITYESSQVDPGTDLEPGVLMSAETITSETTSTTTTTHITK	TITYESSQVDPGTDLEPGVLMSAQTITSETTSTTTTTHITK	NX_Q9Y2J2-1	EPB41L3	1007	Q->E	n.d.	COSM1734869	NX_Q9Y2J2-2	n.d.	n.d.	n.d.	n.d.	5.4284	n.d.	5773.26
GVVPLAGTDGETTTQGLDGLSEHCAQYK	GVVPLAGTDGETTTQGLDGLSER	NX_P09972-1	ALDOC	134	R->H	rs149037077	n.d.	n.d.	n.d.	n.d.	n.d.	n.d.	5.0159	n.d.	5773.26
CPEALFQPSFLGMESCGIHETTFNSVMK	CPEALFQPSFLGMESCGIHETTFNSIMK	NX_P63261-1	ACTG1	282	I->V	n.d.	COSM308849	n.d.	n.d.	n.d.	n.d.	n.d.	5.083	n.d.	5127.58
CEAFGWHAIIVDGHSVDELCK	CEAFGWHAIIVDGHSVEELCK	NX_P29401-1	TKT	222	E->D	rs143404282	n.d.	NX_P29401-2	n.d.	n.d.	n.d.	n.d.	5.2946	n.d.	49.8307
FGIQAQLVTTDFQK	FGIQAQMVTTDFQK	NX_P49720-1	PSMB3	34	M->L	rs4907	n.d.	n.d.	n.d.	n.d.	n.d.	n.d.	4.1555	n.d.	5252.76
GETGPAGPAGPVGPVGAR	GETGPAGPTGPVGPVGAR	NX_P02452-1	COL1A1	1075	T->A	rs1800215	COSM4130378	n.d.	4.2187	n.d.	4.3315	n.d.	4.2489	n.d.	5140.19
GSTPPQPGVSPPAAPAAPGPK	GSTHPQPGVSPPAAPAAPGPK	NX_O94925-1	GLS	89	H->P	rs143584207	n.d.	NX_O94925-2	n.d.	n.d.	n.d.	n.d.	4.1187	n.d.	5848.64
SLHHTQVDPAMDDSNVHISSLR	SLHHTQVDPAMDDSDVHISSLR	NX_Q9NYS7-1	WSB2	290	D->N	rs34549466	n.d.	NX_Q9NYS7-2	n.d.	n.d.	n.d.	6.575	n.d.	n.d.	5330.52
QGSATSASSAGPHSAASEGTLQR	QGSATSASSAGPHSAASEGTVQR	NX_Q9H1R2-2	DUSP15	194	V->L	rs947310	COSM3749696	NX_Q9H1R2-3	n.d.	n.d.	n.d.	9.8129	n.d.	n.d.	441.9
FVLINWTGEGVNHVR	FVLINWTGEGVNDVR	NX_Q9UJU6-1	DBNL	91	D->H	rs139647339	n.d.	NX_Q9UJU6-2	n.d.	n.d.	n.d.	5.4508	n.d.	n.d.	235.008
LPLDINPMVHPHGHIFK	LPLDINPVVHPHGHIFK	NX_Q14166-1	TTLL12	297	V->M	rs11704935	COSM4156362	n.d.	n.d.	n.d.	n.d.	6.7	n.d.	n.d.	6.099
ATLELTHNWGTEDDATQSYHNGNSDPR	ATLELTHNWGTEDDETQSYHNGNSDPR	NX_Q04760-1	GLO1	111	E->A	rs4746	n.d.	n.d.	n.d.	5.4923	n.d.	5.5735	n.d.	n.d.	60.4599
VGAHSGEYGAEALER	VGAHAGEYGAEALER	NX_P69905-1	HBA1	22	A->S	rs281864817	n.d.	n.d.	n.d.	5.1874	n.d.	4.9603	n.d.	n.d.	5384.56
QHVGSSTEFMEAWR	QHVGSSAEFMEAWR	NX_P22676-1	CALB2	110	A->T	rs11545954	n.d.	n.d.	n.d.	5.6749	n.d.	5.3192	n.d.	n.d.	275.284
EVAQQAVDADVHAVGVSTLAAGHK	EVAQQAVDADVHAVGISTLAAGHK	NX_P22033-1	MUT	671	I->V	rs8589	COSM4004063	n.d.	5.046	6.1343	n.d.	7.4294	n.d.	n.d.	5105.52
VADALTNAVAHVDDIPNALSALSDLHAHK	VADALTNAVAHVDDMPNALSALSDLHAHK	NX_P69905-1	HBA1	77	M->I	rs41400445	n.d.	n.d.	n.d.	n.d.	8.0709	6.6764	n.d.	n.d.	5606.03
LHLQAPQHYPDANHKPDMAIALTPFQGLCGFRPVEEIVTFLK	LHLQAPQHYPDANHKPEMAIALTPFQGLCGFRPVEEIVTFLK	NX_P34949-1	MPI	137	E->D	n.d.	COSM1517481	NX_P34949-2	n.d.	n.d.	n.d.	9.3387	n.d.	n.d.	10.6568
ICIDAMHGVVGPYVK	IDAMHGVVGPYVK	NX_P36871-1	PGM1	221	R->C	rs1126728	COSM3735979	NX_P36871-2	n.d.	n.d.	4.3275	5.6582	n.d.	n.d.	5127.58
CPSPPMTNLISVGGQHQGVFGLPR	CPSPPMINLISVGGQHQGVFGLPR	NX_P50897-1	PPT1	134	I->T	rs1800205	COSM3751190	n.d.	n.d.	n.d.	n.d.	5.7154	n.d.	n.d.	5428.32
SEALPTDLPTPSAPDLTEPK	SEALPTDLPAPSAPDLTEPK	NX_P14314-1	PRKCSH	291	A->T	rs11557488	n.d.	NX_P14314-2	n.d.	n.d.	4.8554	n.d.	n.d.	n.d.	57.9077
GSMSDSANILDDVPFPAR	GSMSDSANILDEVPFPAR	NX_Q15049-1	MLC1	187	E->D	rs148532625	n.d.	NX_Q15049-2	n.d.	n.d.	5.8165	n.d.	n.d.	n.d.	15.3081
TQTDSEAQESTATSDETK	TQTDSEVQESTATSDETK	NX_Q01484-4	ANK2	2369	V->A	rs28377576	COSM4158756	n.d.	n.d.	n.d.	6.1488	n.d.	n.d.	n.d.	5795.52
MVLLCDPPYHFPDDLSYR	GMVLLCDPPYHFPDDLSYR	NX_Q12860-1	CNTN1	153	G->R	n.d.	COSM1676867	NX_Q12860-3	n.d.	n.d.	4.1232	n.d.	n.d.	n.d.	5515.27
NSTIVFPLPIDTLQGIIGAK	NSTIVFPLPIDMLQGIIGAK	NX_P27105-1	STOM	275	M->T	n.d.	COSM1624498	NX_P27105-2	n.d.	n.d.	4.8193	n.d.	n.d.	n.d.	5384.56
LLHYESSALPSGQLTSLSEYASR	YESSALPSGQLTSLSEYASR	NX_Q12931-1	TRAP1	469	R->H	rs144787542	COSM215648	NX_Q12931-2	n.d.	n.d.	5.2917	n.d.	n.d.	n.d.	470.276
YIELFLNSTPGGGSGMGGSGMGAYGR	YIELFLNSTPGGGSGMGGSGMGGYGR	NX_P31942-1	HNRNPH3	284	G->A	rs16925347	n.d.	NX_P31942-2;NX_P31942-4	n.d.	n.d.	5.6716	n.d.	n.d.	n.d.	3657.85
LCYVALDFEQEMATAASFSSLEK	LCYVALDFEQEMATAASSSSLEK	NX_P63261-1	ACTG1	233	S->F	n.d.	COSM1177799	n.d.	n.d.	n.d.	4.5288	n.d.	n.d.	n.d.	7167.39
VAVTSSSSSSSSSSIPSAEK	VAVTSSSSSSSSSSSIPSAEK	NX_Q6WCQ1-1	MPRIP	178	TS->T	rs3833098	COSM249625	NX_Q6WCQ1-1;NX_Q6WCQ1-2;NX_Q6WCQ1-3;	5.8819	n.d.	5.5568	n.d.	n.d.	n.d.	5200.74
HTLSFVDVGTGK	HTLSYVDVGTGK	NX_P31040-1	SDHA	629	Y->F	rs6960	COSM1666612	NX_P31040-2	n.d.	n.d.	3.4361	n.d.	n.d.	n.d.	58.3988
TTGIVMDSGDGVTHTVPIYEAYALPHAILR	TTGIVMDSGDGVTHTVPIYEGYALPHAILR	NX_P63261-1	ACTG1	168	G->A	n.d.	COSM985867	n.d.	7.4149	n.d.	6.8014	n.d.	n.d.	n.d.	5606.03
GQGQSVQMSGAVK	GQGQSVQMSGAIK	NX_Q92609-1	TBC1D5	696	I->V	rs1138454	n.d.	NX_Q92609-2	n.d.	n.d.	3.8825	n.d.	n.d.	n.d.	1.55874
GILLYGPPGTGK	GILLFGPPGTGK	NX_Q6PIW4-1	FIGNL1	440	F->Y	n.d.	COSM1451332	NX_Q6PIW4-2	n.d.	n.d.	3.3412	n.d.	n.d.	n.d.	47.9034
DTEEEDFHVDQATTVK	DTEEEDFHVDQVTTVK	NX_P01009-1	SERPINA1	237	V->A	rs6647	COSM3754195	NX_P01009-2	n.d.	n.d.	5.6338	n.d.	n.d.	n.d.	59.9429
TEEAGDEIETFR	TEEAGDEIETFGLGVTYEQALAK	NX_P11137-1	MAP2	991	G->R	rs35927101	n.d.	NX_P11137-3	n.d.	n.d.	3.336	n.d.	n.d.	n.d.	5773.26
VIHDNFGILEGLMTTVHAITATQK	VIHDNFGIVEGLMTTVHAITATQK	NX_P04406-1	GAPDH	171	V->L	n.d.	COSM1323110	NX_P04406-2	n.d.	n.d.	6.8667	n.d.	n.d.	n.d.	5428.32
SQLGSTPLHGQPLVVLQGNNIILEHHVAQEPSPGQPSTFIVPFR	SQPGSTPLHGQPLVVLQGNNIILEHHVAQEPSPGQPSTFIVPFR	NX_P98160-1	HSPG2	1019	P->L	rs62642528	n.d.	n.d.	n.d.	9.6713	n.d.	n.d.	n.d.	n.d.	5385.81
AAAIGINLGTTYSCVGVFQHGK	AAAIGIDLGTTYSCVGVFQHGK	NX_P08107-1	HSPA1A	10	D->N	ReducesaffinityforADP (Uniprot)		NX_P08107-2	n.d.	6.0295	n.d.	n.d.	n.d.	n.d.	5127.58
VSEQKPQATYYNIDMLK	VSEQKPQATYYNVDMLK	NX_Q9BQI5-1	SGIP1	671	V->I	rs140384550	n.d.	NX_Q9BQI5-2;NX_Q9BQI5-4	n.d.	7.1259	n.d.	n.d.	n.d.	n.d.	5200.74
EGEDPQASAQDETPITSAK	EGEEPQASAQDETPITSAK	NX_Q02952-1	AKAP12	1600	E->D	rs3823310	COSM4160299	NX_Q02952-2	4.4479	n.d.	n.d.	n.d.	n.d.	n.d.	5773.26
ACPCSSSAQVLQELLSR	ACPCASSAQVLQELLSR	NX_Q92752-1	TNR	128	A->S	rs2239819	COSM3750632	NX_Q92752-2	6.0689	n.d.	n.d.	n.d.	n.d.	n.d.	5385.81
VVAGVANALADK	VVAGVANALAHK	NX_P68871-1	HBB	144	H->D	rs33929415	n.d.	n.d.	3.0506	n.d.	n.d.	n.d.	n.d.	n.d.	5848.64
GVLMANFLTQGQVCCNGTR	GALMANFLTQGQVCCNGTR	NX_P49189-1	ALDH9A1	276	A->V	rs1143660	n.d.	n.d.	6.1728	n.d.	n.d.	n.d.	n.d.	n.d.	5525.34
HMAGAAAAGAVVGGLGGYVLGSAMSRPIIHFGSDYEDR	HMAGAAAAGAVVGGLGGYMLGSAMSRPIIHFGSDYEDR	NX_P04156-1	PRNP	129	M->V	rs1799990	COSM42856	n.d.	n.d.	n.d.	7.4566	6.0392	n.d.	n.d.	246.32
n.d. : not determined
